1 **The lemur baseline: How lemurs compare to monkeys and apes in the Primate Cognition**

2 **Test Battery**

3

4 Claudia Fichtel<sup>1,2</sup>, Klara Dinter<sup>1,3</sup> and Peter M. Kappeler<sup>1,2,3</sup>

5

6 <sup>1</sup> Behavioral Ecology & Sociobiology Unit

7 German Primate Center (DPZ)

8 Kellnerweg 4, 37077 Göttingen, Germany

9

10 <sup>2</sup>Leibniz ScienceCampus “Primate Cognition”, Göttingen, Germany

11

12 <sup>3</sup>Department of Sociobiology/Anthropology

13 Johann-Friedrich-Blumenbach Institute of Zoology and Anthropology, University of Göttingen

14 Kellnerweg 6, 37077 Göttingen, Germany

15

16

17 ORCIDs:

18 Claudia Fichtel: 0000-0002-8346-2168

19 Klara Dinter: 0000-0002-0339-3036

20 Peter Kappeler: 0000-0002-4801-487X

21

22

23

24

25

26

27

28 **ABSTRACT**

29 Primates have relatively larger brains than other mammals even though brain tissue is  
30 energetically costly. Comparative studies of variation in cognitive skills allow testing of  
31 evolutionary hypotheses addressing socioecological factors driving the evolution of primate  
32 brain size. However, data on cognitive abilities for meaningful interspecific comparisons are  
33 only available for haplorhine primates (great apes, Old- and New World monkeys) although  
34 strepsirrhine primates (lemurs and lorises) serve as the best living models of ancestral primate  
35 cognitive skills, linking primates to other mammals. To begin filling this gap, we tested  
36 members of three lemur species (*Microcebus murinus*, *Varecia variegata*, *Lemur catta*) with  
37 the Primate Cognition Test Battery, a comprehensive set of experiments addressing physical  
38 and social cognitive skills that has previously been used in studies of haplorhines. We found no  
39 significant differences in cognitive performance among lemur species and, surprisingly, their  
40 average performance was not different from that of haplorhines in many aspects. Specifically,  
41 lemurs' overall performance was inferior in the physical domain but matched that of  
42 haplorhines in the social domain. These results question a clear-cut link between brain size and  
43 cognitive skills, suggesting a more domain-specific distribution of cognitive abilities in  
44 primates, and indicate more continuity in cognitive abilities across primate lineages than  
45 previously thought.

46

47 **Keywords:** cognition, Primate Cognition Test Battery, primates, lemurs

48

## 49 INTRODUCTION

50 One central question in comparative cognition is why primates have evolved larger brains and  
51 enhanced cognitive skills compared to other equally-sized mammalian species (Shettleworth  
52 2010). Among primates, this effect is paralleled by a disproportionate increase in brain size  
53 from strepsirrhines to haplorhines and humans (Dunbar 1992; Isler et al. 2008; Jerison 1973;  
54 Martin 1981). Because larger brains are energetically more expensive (Aiello and Wheeler  
55 1995), they are assumed to confer benefits with regard to enhanced cognitive abilities that  
56 compensate this additional investment (Navarrete et al. 2011; Reader and Laland 2002; Reader  
57 et al. 2011).

58 Several non-mutually exclusive hypotheses on the evolution of brain size have been  
59 proposed to account for the distinctive cognitive abilities of primates (Dunbar and Shultz 2017).  
60 According to the *General intelligence hypothesis*, larger brains are thought to confer an  
61 advantage because of faster learning and larger memory capacities (Spearman 1904). The  
62 *Ecological intelligence hypothesis* suggests that environmental and ecological challenges in  
63 food acquisition, including spatial and spatio-temporal processes to memorize seasonally  
64 available food or manipulative skills for extractive foraging, selected for larger brains (Byrne  
65 1996; Clutton-Brock and Harvey 1980; Heldstab et al. 2016; Milton 1981; Powell et al. 2017).  
66 Several versions of the *Social brain hypothesis* posit that increased cognitive skills in primates  
67 evolved in response to the constant challenges associated with the complexity of social life,  
68 such as competition and cooperation within larger social groups (Byrne and Whiten 1988;  
69 Dunbar 1992; Dunbar and Shultz 2007; Humphrey 1976; Jolly 1966a; Kudo and Dunbar 2001).  
70 However, support for the *Social brain hypothesis* is not uniform in other taxa, with brain size  
71 correlating positively with measures of sociality in some insectivores, bats and ungulates (e.g.  
72 Barton et al. 1995; Byrne and Bates 2010; Dunbar and Bever 1998; Shultz and Dunbar 2006),  
73 but not in corvids (Emery et al. 2007; Shultz and Dunbar 2007), and it is equivocal in carnivores  
74 (Benson-Amram et al. 2016; Dunbar and Bever 1998; Finarelli and Flynn 2009; Holekamp et

75 al. 2007; Pérez-Barbería et al. 2007). Moreover, recent comparative analyses among primates  
76 indicated that brain size is associated with ecological (home range size, diet, activity period),  
77 but not with social factors (DeCasien et al. 2017; Powell et al. 2017), also challenging the social  
78 brain hypothesis.

79 Since these studies usually link interspecific variation in brain size with certain socio-  
80 ecological factors, it is essential to understand how brain size actually impacts cognitive skills.  
81 Hence, comparative studies of cognitive abilities, ideally using identical tests, across the  
82 primate order and beyond are required. However, comparisons of performance in cognitive  
83 experiments across species may fail due to variation in the experimental set-up and specific  
84 methods (van Horik and Emery 2011; Krasheninnikova et al. 2019; MacLean et al. 2012).

85 To overcome this problem, Herrmann and colleagues (2007) assembled a systematic  
86 toolbox for comparative analysis, called the *Primate Cognition Test Battery* (PCTB), which  
87 compared cognitive skills in various tasks in the physical and social domain among 2.5-year-  
88 old children, chimpanzees (*Pan troglodytes*) and orangutans (*Pongo pygmaeus*). The physical  
89 domain deals with the spatial-temporal-causal relations of inanimate objects, while the social  
90 domain deals with the intentional actions, perceptions, and knowledge of other animate beings  
91 (Tomasello and Call 1997). These tests revealed that children and chimpanzees have similar  
92 cognitive skills for dealing with the physical world, but children have increased cognitive skills  
93 for dealing with the social world, particularly in the scale of social learning. These results  
94 support the *Cultural intelligence hypothesis*, a variant of the Social brain hypothesis, suggesting  
95 that exchanging knowledge within human cultural groups requires specific socio-cognitive  
96 skills, such as social learning or Theory of Mind (e.g. Boyd and Richerson 1998; Herrmann et  
97 al. 2007; Whiten and van Schaik 2007).

98 Application of the PCTB to two other haplorhine primate species, long-tailed macaques  
99 (*Macaca fascicularis*) and olive baboons (*Papio anubis*), revealed that both species performed  
100 similarly to great apes in both the physical and the social domain (Schmitt et al. 2012).

101 Specifically, chimpanzees outperformed macaques only in tasks on spatial understanding and  
102 tool use. Since chimpanzees have relatively larger brains than macaques or baboons (Isler et al.  
103 2008; Jerison 1973), these results question the clear-cut relationship between cognitive  
104 performance and brain size (Schmitt et al. 2012). In addition, four closely related macaque  
105 species that differ in their degree of social tolerance, performed similarly in cognitive tests of  
106 the PCTB in the physical domain. However, socially more tolerant species performed better in  
107 one task of the social domain and the inhibitory control task, suggesting that social tolerance is  
108 associated with a set of cognitive skills that are specifically required for cooperation (Joly et al.  
109 2017). Thus, further studies on additional non-human primates are required to explore the  
110 interrelationships among cognitive abilities, socio-ecological traits and brain size  
111 (ManyPrimates et al. 2019).

112         Strepsirrhine primates are the obvious candidates for such an extended comparative  
113 approach because they represent the best living models of the earliest primates and the link  
114 between primates and other mammalian orders (Fichtel and Kappeler 2010; MacLean et al.  
115 2008). Strepsirrhines split off from the main primate lineage approximately 60 million years  
116 ago and retained many ancestral primate traits (Martin 1990; Yoder et al. 1996; Yoder and Yang  
117 2004). Importantly, strepsirrhine primates have relatively smaller brains than haplorhines, and  
118 their brain size does not correlate with group size (MacLean et al. 2009). Although older studies  
119 suggested that strepsirrhine primates possess physical cognitive abilities that are inferior to  
120 those of haplorhines (e.g. Ehrlich et al. 1976; Jolly 1964; Maslow and Harlow 1932), recent  
121 studies indicated that their cognitive skills are similar to those of haplorhines (e.g. Deppe et al.  
122 2009; Fichtel and Kappeler 2010; Kittler et al. 2015, 2018; Santos et al. 2005a, b). However,  
123 existing studies of strepsirrhine cognition used isolated tests, hampering systematic  
124 interspecific comparisons. Hence, a comprehensive study investigating a broad variety of tasks  
125 addressing different cognitive skills in lemurs, and replicating the exact same methods used in  
126 the PCTB, seems indicated for a systematic comparison across both primate suborders.

127 To this end, we applied the PCTB to three species of lemur that differ in key socio-  
128 ecological traits: ring-tailed lemurs (*Lemur catta*), black-and-white ruffed lemurs (*Varecia*  
129 *variegata*; in the following: ruffed lemurs) and gray mouse lemurs (*Microcebus murinus*, Table  
130 1). Mouse lemurs have one of the smallest brain sizes among primates, and absolute brain size  
131 increases from mouse lemurs over ring-tailed lemurs to ruffed lemurs (Isler et al. 2008). Ring-  
132 tailed lemurs are diurnal opportunistic omnivores that live in groups of on average 14  
133 individuals (Gould et al. 2003; Jolly 1966b; Sussman 1991). Ruffed lemurs are diurnal,  
134 frugivorous and live in small groups (average 6 individuals), exhibiting a fission-fusion social  
135 organization (Baden et al. 2015; Holmes et al. 2016; Vasey 2003). Gray mouse lemurs are  
136 nocturnal, omnivorous solitary foragers that form sleeping-groups among related females  
137 (Eberle and Kappeler 2006; Isler et al. 2008).

138 According to the *General intelligence hypothesis*, we predicted that the tested apes and  
139 monkeys outperform lemurs because they have absolutely larger brains (Table 1). In accordance  
140 with the *Ecological intelligence hypothesis* we predicted that the more frugivorous species or  
141 those with a broader dietary breadth perform better (Table 1). Because lemurs generally live in  
142 smaller groups than monkeys and apes (Kappeler and Heymann 1996), we predicted that they  
143 should have inferior cognitive abilities than the already tested group-living species according  
144 to the *Social intelligence hypothesis* (Table 1).

145

## 146 **METHODS**

147 Experiments were conducted with adult individuals of gray mouse lemurs (n=9-15), ring-tailed  
148 lemurs (n=26-27) and black-and-white ruffed lemurs (n=13). All individuals were born in  
149 captivity and housed in enriched or semi-natural environments, either at the German Primate  
150 Centre (DPZ, Göttingen) or the Affenwald Wildlife Park (Straußberg, Germany). The lemurs  
151 at the Affenwald range freely within a 3.5 ha natural forest enclosure. At the DPZ, ring-tailed  
152 and ruffed lemurs are offered indoor and outdoor enclosures equipped with enriching climbing

153 materials and natural vegetation. The nocturnal mouse lemurs are kept indoors with an  
154 artificially reversed day-night-cycle, and cages are equipped with climbing material, fresh  
155 natural branches and leaves. All individuals were tested individually in their familiar indoor  
156 enclosures and were unfamiliar with the presented tasks. Since some individuals passed away  
157 during the course of the study, not all individuals participated in every task of the test battery  
158 (Table S1, Supplemental). To ensure comparability with the previous studies, the experimental  
159 setup was replicated after the PCTB (Herrmann et al. 2007; Schmitt et al. 2012), and only  
160 objects presented in the tests were adjusted in size for lemurs.

161

### 162 ***Ethical statement***

163 All animal work followed relevant national and international guidelines. The animals were kept  
164 under conditions documented in the European Directive 2010/63/EU (directive on the  
165 protection of animals used for experimental and other scientific purposes) and the EU  
166 Recommendations 2007/526/EG (guidelines for the accommodations and care of animals used  
167 for experimental and other scientific purposes). Consultation and approval of the experimental  
168 protocols by the Animal Welfare Body of the German Primate Center is documented (E2-17).

169

### 170 ***General testing procedure***

171 During the experiments, individuals were briefly separated from the group. The testing  
172 apparatus for all tasks consisted of a table with a sliding board on top that was attached to the  
173 fence of the subjects' enclosures (Figure S2, Supplemental). In most of the tasks two or three  
174 opaque cups (ruffed- & ring-tailed lemurs: Ø 6.8 cm x 7.5 cm; mouse lemurs: Ø 2.5 cm x 3  
175 cm), which were placed upside down in a row on the sliding board, were used to cover the food  
176 reward (see also Supplemental). If necessary, a cardboard occluder was put on top of the sliding  
177 board between the experimental setup and the individual to hide the baiting process from the  
178 individuals. The position of the reward was randomized and counter-balanced across all

179 possible locations, and the reward was never put in the same place for more than two  
180 consecutive trials. Once the board was pushed into reach of an individual, the experiment began  
181 and, depending on the task, the individual had to manipulate an item or indicate its choice by  
182 pointing or reaching towards the chosen item, to obtain the reward if chosen correctly. If the  
183 choice was incorrect, the correct location of the reward was shown to the individual after each  
184 trial.

185 For most of the tasks at least 6 trials were conducted per individual and setup (Table S1,  
186 Supplemental). Raisins and pieces of banana served as rewards. During testing, no possible  
187 cues to where the reward was located were provided by the experimenter; she simply put her  
188 hands on her lap and her gaze was directed downwards. All experiments were videotaped and  
189 responses of the subjects to the tasks coded afterwards from the videos. A naïve second observer  
190 additionally scored 20% of all trials a second time to assess inter-observer reliability. The  
191 Interclass Correlation Coefficient was excellent ( $ICC = 0.985$ ).

192

### 193 ***The Primate Cognition Test Battery***

194 All experimental setups and methods were replicated from the *PCTB* (Herrmann et al. 2007;  
195 Schmitt et al. 2012). Following Schmitt et al. (2012), we also doubled the number of trials for  
196 all object-choice tasks of the test battery (Table S1, Supplemental) to evenly distribute objects  
197 between all possible spatial positions and combinations of manipulations. In total, the *PCTB*  
198 consists of 16 different experimental tasks, 10 investigating physical and 6 social cognitive  
199 skills. These tasks can be grouped into 6 different scales: space, quantity and causality for the  
200 physical and social learning, communication and Theory of Mind for the social domain.

201 In the *physical domain*, the *scale space* examines the ability to track objects in space in  
202 four tasks: spatial memory, object permanence, rotation and transposition. The *scale quantity*  
203 tests the numerical understanding of individuals and consists of two tasks: relative numbers and  
204 addition numbers. The *scale causality* consists of four tasks: noise, shape, tool use and tool



205 properties to examine the ability to understand spatial-causal relationships. In the *social*  
206 *domain*, the *scale social learning* examines in one task whether individuals use social  
207 information provided by a human demonstrator to solve a problem. The *scale communication*  
208 examines whether individuals are able to understand communicative cues given by humans in  
209 three tasks: comprehension, pointing cups and attentional state. Finally, in the *scale Theory of*  
210 *Mind*, individuals were confronted with two tasks: gaze following and intentions. A detailed  
211 description of the general setup and the methodology of the experiments can be found in the  
212 supplementary material (Supplemental).

213

#### 214 ***Temperament, inhibitory control, rank and learning effect***

215 To assess the influence of temperament, inhibitory control and dominance rank on lemurs'  
216 performances in the test battery, individuals participated in a set of additional tests (Herrmann  
217 et al. 2007; Schmitt et al. 2012). Due to logistic constraints, the temperament tests could only  
218 be conducted with ring-tailed and ruffed lemurs. For temperament, we measured whether  
219 individuals would approach novel objects, people and foods (for details see Supplemental).  
220 Inhibitory control was measured during an additional session of the spatial memory task, in  
221 which out of three cups only the two outer ones were baited with a reward and hence,  
222 individuals had to skip the cup in the middle. Dominance rank (high, middle or low-ranking)  
223 was inferred by focal observations of ring-tailed and ruffed lemurs but not for the solitary mouse  
224 lemurs, according to Pereira and Kappeler (1997). We also controlled for potential learning  
225 effects within the trials of a task by calculating Pearson's correlations between performance in  
226 the first and second half of trials.

227

#### 228 ***Data analyses***

229 We measured the performance of individuals by the proportion of correct responses for each  
230 task. We applied Wilcoxon tests followed by Benjamini-Hochberg corrections (for multiple

231 testing) for each task and lemur species to examine whether they performed above chance level.  
232 Since no individual solved the social learning task and only one the tool use task, we omitted  
233 both tasks from the interspecies comparisons. To analyse whether the three lemur species  
234 differed in their performance in the tasks of the PCTB, we used multivariate analysis of variance  
235 (MANOVA) with species, sex, rank, age and age:species as between-subject factor and their  
236 performance in all tasks as dependent variable. To compare all three species' performances  
237 between the different tasks, we used univariate analysis of variance (ANOVA, for normally  
238 distributed data) or Kruskal-Wallis tests followed by *post hoc* analyses (with Bonferroni  
239 correction). For significant results, we used an analysis of covariance (ANCOVA) to control  
240 for age in these tasks.

241 Comparisons of performance in tests of the PCTB were conducted between the three  
242 lemur species and four haplorhine species (chimpanzees, orangutans, olive baboons, and long-  
243 tailed macaques) for which data on individual performance were kindly provided by E.  
244 Herrmann and V. Schmitt. On the scale level we applied a MANOVA, followed by ANOVAs  
245 or Kruskal-Wallis tests and *post hoc* corrections (Bonferroni) in case of significant results. All  
246 statistical analyses were conducted in R version 3.2.2 (R Core Team, Vienna, Austria).

247

## 248 **RESULTS**

### 249 ***Lemurs' performance in the physical and social domain***

250 In the *physical domain*, the chance level was at 33% in all four tasks of the *scale space*. The  
251 three lemur species performed significantly above chance level in the spatial memory and the  
252 rotation task (Table 2, Fig. 1). In the object permanence tasks, only ruffed lemurs performed  
253 above chance level, while in the control task, all three species performed above chance level  
254 (Table 2, Fig. 1). In the *scale quantity*, the three lemur species performed significantly above  
255 chance level (50%) in both tasks (Table 2, Fig. 1). In the *scale causality*, the tool use task was

256 successfully solved by only one ring-tailed lemur. However, in the shape and tool properties  
257 tasks, all three lemur species performed above chance level (50%; Table 2).

258         In the *social domain*, no lemur solved the social learning task using a similar technique  
259 as demonstrated by a human experimenter (Table 2, Fig. 1). In the *scale communication*, all  
260 three lemur species performed significantly above chance level (50%) in the comprehension  
261 task, whereas only mouse lemurs performed above chance level (50%) in the pointing cups  
262 task. No lemur species performed above chance level in the attentional state task. In the *scale*  
263 *Theory of Mind*, none of the lemur species did follow the gaze of the human experimenter  
264 upwards significantly more often than in the control condition in which no cue was given  
265 (baseline: 20%; Table 2, Fig. 1). In contrast, all lemur species performed significantly above  
266 chance level (50%) in the intentions task (Table 2, Fig. 1).

267

### 268 ***Influence of age, sex and rank on performance of the three lemur species***

269 Because the tool use task was solved by only one individual and the social learning task by  
270 none, these two tasks were excluded from this comparison. A multivariate analysis of variance  
271 of the 14 remaining tasks revealed no differences in the average performance among the three  
272 lemur species (MANOVA; Wilk's  $\Lambda=0.498$ ,  $F(19,14)=1.37$ ,  $p=0.257$ ). Furthermore, average  
273 performance was not influenced by sex (Wilk's  $\Lambda=0.461$ ,  $F(19,14)=1.59$ ,  $p=0.173$ ), rank  
274 (Wilk's  $\Lambda=0.273$ ,  $F(38,28)=1.24$ ,  $p=0.268$ ), age (Wilk's  $\Lambda=0.568$ ,  $F(19,14)=1.03$ ,  $p=0.466$ ) or  
275 age within species (age:species; Wilk's  $\Lambda=0.599$ ,  $F(19,14)=0.91$ ,  $p=0.566$ ).

276

### 277 ***Personality, inhibitory control and learning***

278 The three temperament measures (latency, proximity and duration) of ring-tailed or ruffed  
279 lemurs did neither correlate with the performance in the physical domain of the PCTB  
280 (Pearson's correlations, all  $p>0.05$ , see Supplemental), nor with the performance of ring-tailed  
281 lemurs in the *social domain*. In ruffed lemurs, however, the latency to approach and proximity

282 to a novel stimulus correlated with performance in the social domain (latency to approach:  
283 Pearson's correlation,  $r(11)=0.61$ ,  $p=0.026$ ; proximity: Pearson's correlation,  $r(11)=-0.59$ ,  
284  $p=0.032$ ). No correlation was found between time individuals spent close to the setup (duration)  
285 and performance (Pearson's correlation,  $r(11)=-0.30$ ,  $p=0.323$ ). Performance in the inhibitory  
286 control task did not correlate with performance in the physical and social domain (see Table  
287 S4, Supplemental). In addition, we did not find a learning effect in performance between the  
288 first and second half of trials within the tasks (Wilcoxon Signed-Rank test:  $V=806.5$ ,  $p=0.585$ ).

289

### 290 ***Comparison of lemurs and haplorhines in the physical and social domain***

291 The comparison of chimpanzees, orangutans, baboons, macaques, ruffed-, ring-tailed- and  
292 mouse lemurs in their overall average performance in the two domains revealed differences  
293 among species (Wilk's  $\Lambda=0.383$ ,  $F(406,12)=20.87$ ,  $p<0.001$ ). Species differed in performance  
294 in the *physical domain* (Kruskal-Wallis,  $\chi^2=127.26$ ,  $df=6$ ,  $p<0.001$ ; Fig. 2), but not in the *social*  
295 *domain* (Kruskal-Wallis,  $\chi^2=10.25$ ,  $df=6$ ,  $p=0.115$ ; Fig. 2). In the *physical domain*, only  
296 chimpanzees performed significantly better than ruffed lemurs, and chimpanzees and  
297 orangutans outperformed ring-tailed and mouse lemurs (see Table S4, Supplemental).

298

### 299 ***Comparison of lemurs and haplorhines in the different scales***

300 For a more detailed comparison of all seven species, we conducted a MANOVA including each  
301 individuals' overall performance in all six scales, which revealed significant differences among  
302 species (Wilk's  $\Lambda=0.284$ ,  $F(833,36)=7.68$ ,  $p<0.001$ ). Species differed in all scales except the  
303 *scale communication* (ANOVAs or Kruskal-Wallis tests, see Table 3; Fig. 3). In the *scale space*,  
304 chimpanzees outperformed all other species, except baboons. Orangutans performed better than  
305 ruffed and ring-tailed lemurs, baboons performed better than all three lemur species, and  
306 macaques performed similar to all lemur species (Table 4; Fig. 3). In the *scale quantity*, only  
307 chimpanzees performed better than ring-tailed lemurs (Table 4; Fig. 3), and in the *scale*

308 *causality*, chimpanzees outperformed all other species, and orangutans performed better than  
309 mouse lemurs (Table 4; Fig. 3). However, this scale was strongly biased by the results of the  
310 tool use task, which was only solved by chimpanzees, orangutans and one ring-tailed lemur.  
311 Excluding the tool use task from this comparison revealed that only chimpanzees performed  
312 better than mouse lemurs (Table 4; Fig. S2, Supplemental).

313 In the *social domain*, all species, except great apes, performed poorly in the social  
314 learning task, whereas all species performed equally well in the *scale communication* (Table 4;  
315 Fig. 3). In the *scale Theory of Mind*, however, chimpanzees performed less good than macaques  
316 and ring-tailed lemurs. All other species performed better than orangutans, except mouse lemurs  
317 and macaques, and ring-tailed lemurs outperformed mouse lemurs (Table 4; Fig. 3).

318

## 319 **DISCUSSION**

320 In this study, we applied the Primate Cognition Test Battery to three lemur species differing in  
321 socioecological traits and brain size and compared their performance with that of four  
322 haplorhine species tested in previous studies with the exact same methods. In the *physical*  
323 *domain*, apes and baboons performed better than lemurs in the *space scale*, chimpanzees  
324 performed better than ring-tailed lemurs in the *quantity scale* but no differences among species  
325 were found in the *causality scale*, after excluding the tool use task. In the *social domain*, lemurs  
326 performed at level to apes and monkeys. Most interestingly, in the *Theory of Mind scale*, great  
327 apes were outperformed by all other species except mouse lemurs. Since these species differ in  
328 relative and absolute brains size (Table 1), with a more than 200-fold difference in brain size  
329 between mouse lemurs and orangutans or chimpanzees, our results do not support the notion of  
330 a clear-cut link between brain size and cognitive skills, but suggest a more domain-specific  
331 distribution of cognitive abilities in primates.

332 In the *physical domain*, lemurs were outperformed by apes and baboons in the *space*  
333 *scale*. The species with the largest brains (apes and baboons) performed better than all other

334 species, supporting the General intelligence hypothesis. These findings are in line with an  
335 earlier study showing that apes and monkeys differ in their ability to track object displacements  
336 (Amici et al. 2010). Spatial understanding is also important to remember food resources or to  
337 track conspecifics (Dunbar and Shultz 2017), and species (chimpanzees, orangutans, baboons)  
338 having a larger dietary breadth performed better in these tasks, but the species with the highest  
339 amount of fruits in the diet (ruffed lemurs) did not perform better than other species, providing  
340 only partial support for the Ecological intelligence hypothesis. There was no clear pattern  
341 between group size and performance in the *space scale*, providing no support for the Social  
342 intelligence hypothesis.

343         In the *quantity scale*, only chimpanzees performed better than ring-tailed lemurs, and  
344 all other species performed similarly, indicating that a certain level of numerical understanding  
345 appears to be a basal cognitive trait of all primates. These results support earlier studies  
346 indicating that lemurs do not differ from haplorhine primates in numerosities and simple  
347 arithmetic operations (Jones and Brannon 2012; Merritt et al. 2011; Santos et al. 2005a). Since  
348 a comparable numerical understanding as tested in the PCTB has also been reported for various  
349 taxa outside the primate order, including fish and insects (e.g. Agrillo et al. 2012; Chittka and  
350 Geiger 1995; Pahl et al. 2013; but see Krasheninnikova et al. 2019), a basal numerical  
351 understanding may be present in many animals.

352         In the *causality scale*, lemurs performed as well as both monkey species, but all  
353 monkeys and lemurs were outperformed by chimpanzees, who excelled in the tool use task.  
354 Even natural tool users, such as orangutans and long-tailed macaques (Brotcorne et al. 2017;  
355 van Schaik et al. 2003), hardly solved this task (Schmitt et al. 2012). It required the ability to  
356 use a stick to rake a food reward into reach, which might have been too challenging for species  
357 exhibiting either a medium (baboons, macaques) or low (lemurs) level of precision grip  
358 (Torigoe 1985). Although long-tailed macaques use stone tools to crack open nuts or mussels,  
359 they do so mainly by applying force rather than using fine-motor skills (Gumert and

360 Malaivijitnond 2012). Thus, the tool use task appears unsuitable for a fair interspecific  
361 comparison. Excluding this task from the *quantity scale* resulted in a rather similar overall  
362 average performance of all species. Interestingly, lemurs that have never been observed to use  
363 tools in the wild (Fichtel and Kappeler 2010; Kittler et al. 2015, 2018), appeared to exhibit an  
364 understanding for the necessary functional properties of pulling tools (Santos et al. 2005b;  
365 Kittler et al. 2018). Hence, except for the *space scale* we did not find systematic species  
366 differences in performance, challenging the notion that there is a domain-general distinction  
367 between haplorhines and strepsirrhines (Deaner et al. 2006). Our results instead suggest the  
368 existence of domain-specific cognitive differences.

369 In the social domain, species differences were less pronounced, and lemurs' overall  
370 performance in the *Theory of Mind scale* was equal to that of monkeys and even superior to that  
371 of apes. In the *social learning scale* neither lemurs, nor baboons or long-tailed macaques solved  
372 the task. However, long-tailed macaques exhibit cultural variation in stone handling techniques  
373 in the wild, indicating that they are able to learn socially (Brotcorne et al. 2017). The ability to  
374 learn socially has also been reported in ring-tailed and ruffed lemurs (e.g. Kappeler 1987;  
375 Kendal et al. 2010; O'Mara and Hickey 2012; Stoinski et al. 2011), but remains unstudied in  
376 mouse lemurs. Since individuals had to learn in this task from a human demonstrator, the  
377 phylogenetic distance between species and the demonstrator might have influenced learning  
378 abilities, because great apes performed better than Old World monkeys and lemurs (Schmitt et  
379 al. 2012). Hence, it remains an open question whether monkeys and lemurs would perform  
380 better when tested with a conspecific demonstrator. Moreover, the task required the ability to  
381 shake a transparent tube or to insert a stick into the tube, which might have been too difficult  
382 for species with limited dexterity (Torigoe 1985). Therefore, a social learning task adapted to  
383 manipulative skills of Old World monkeys and lemurs (Schnoell and Fichtel 2012) might be  
384 more informative in future studies.

385           In the *communication scale*, all species performed equally well, suggesting that all  
386 species can make use of socio-visual cues given by others. This result is in line with those of  
387 several other studies showing the ability to use social-visual cues presented by a human  
388 demonstrator in object-choice experiments in birds (Schmidt et al. 2011), aquatic mammals (sea  
389 lions: Malassis and Delfour 2015; dolphins: Tschudin et al. 2001), domestic animals (dogs:  
390 Kaminski et al. 2005; Miklósi et al. 1998; pigs: Nawroth et al. 2016; goats: Wallis et al. 2015),  
391 as well as other primates (Anderson et al. 1995; Itakura 1996).

392           In contrast, unexpected species differences emerged in the *Theory of Mind scale*, with  
393 great apes performing inferior to both monkeys and lemurs. This difference was mainly due to  
394 better performance of monkeys and lemurs in the intentions task, but not in the gaze following  
395 task. In the gaze following task all lemurs performed below chance level, although it has been  
396 shown that ring-tailed lemurs follow the gaze of conspecifics (Shepherd and Platt 2008) and  
397 that they use human head orientation as a cue for gaze orientation in a food choice paradigm  
398 (Botting et al. 2011, Sandel et al. 2011), questioning the validity of these gaze following tasks.  
399 In the intention task, a human observer tried to reach a cup with a hidden reward repeatedly  
400 with the hand. Monkeys and lemurs might have performed better than apes because they may  
401 have solved the task by using spatial associations between the repeated hand movements and  
402 the cup or by understanding the hand movements as a local enhancement (Shettleworth 2010;  
403 Schmitt et al. 2012). Still, it remains puzzling why chimpanzees and orangutans did not use the  
404 hand movement as a cue for the location of the hidden reward. Even more so because a  
405 comparative study of Theory of Mind compatible learning styles in a simple dyadic game  
406 between seven primate species, including chimpanzees and ring-tailed lemurs, and a  
407 competitive human experimenter revealed that test performance was positively correlated with  
408 brain volume but not with social group size, suggesting that Theory of Mind is mostly  
409 determined by general cognitive capacity (Devaine et al. 2017). Hence, additional social



410 cognitive tests are required to obtain a better understanding of the relationship between brain  
411 size and cognitive performance in the social domain.

412 Altogether, average species performances were generally not as different as it might  
413 have been expected in view of the various hypotheses on the evolution of cognitive abilities.  
414 Except for the scale space, the overall comparison does not provide support for the *General*  
415 *intelligence hypothesis*, since variation in brain size cannot explain the observed results.  
416 Similarly, performances of the seven species did not reflect any clear patterns concerning their  
417 feeding ecology, i.e. the percentage of fruit in the diet or dietary breadth, except for the *space*  
418 *scale* (see Table 1); hence, these results do not provide support for the *Ecological intelligence*  
419 *hypothesis*. Moreover, our results do not provide support for the *Social intelligence hypothesis*  
420 because lemurs, and especially the solitary mouse lemurs, should have performed inferior  
421 compared to the haplorhine species (Dunbar and Shultz 2017).

422 Earlier comparative studies among primates linking performance in a range of  
423 comparable cognitive tests in the physical or social domain revealed a link between  
424 performance in these tasks and brain size (Deaner et al. 2006, 2007; Reader and Laland 2002;  
425 Reader et al. 2011). However, studies using the exact same experimental set up revealed  
426 contradictory results. Two studies addressing only one cognitive ability revealed a positive  
427 relationship between brain size and performance in inhibitory control or Theory of Mind tests  
428 (Maclean et al. 2014; Devaine et al. 2017), but all other studies applying various tests on  
429 inhibitory control and spatial memory (Amici et al. 2008, 2010, 2012) or tasks of the Primate  
430 Cognition Test Battery (Herrmann et al. 2007; Schmitt et al. 2012; this study), found no clear-  
431 cut relationship between brain size and cognitive performance.

432 Even though lemurs performed at level with monkeys and great apes in many of these  
433 experiments, we do not suggest that their cognitive abilities are *per se* on par with those of  
434 larger-brained primates. In the physical domain, species differences emerged only in the space  
435 scale, supporting the General intelligence hypothesis. However, no systematic species

436 differences were found in the quantity or causality scales, which address rather basal cognitive  
437 abilities, which might not be variable enough to reveal actual differences between species.  
438 Indeed, some fish and insects possess similar basal cognitive skills in the physical domain (Fuss  
439 et al. 2014; Loukola et al. 2017; Schluessel et al. 2015). In the social domain, the social learning  
440 task was not suitable for all species, and individuals might have recruited other abilities to solve  
441 the problems, as discussed for the intention task above.

442 Many tests of the PCTB were based on two-or three-choice paradigms in which the costs  
443 for choosing correctly were rather low, because the probability to receive a reward was either  
444 50% or 33%, a random choice strategy might have been still relatively profitable. For example,  
445 performance in a memory task increased in common marmosets (*Callithrix jacchus*) and  
446 common squirrel monkeys (*Saimiri sciureus*) from a two-choice task to a nine-choice task, in  
447 which the probability of success was lowered from 50% to 11%, making a wrong choice more  
448 costly appeared to favour an appropriate learning strategy over a random choice strategy  
449 (Schubiger et al. 2016). The application of a random choice strategy may also explain why four  
450 parrot species that have been tested with the PCTB, may have failed to solve the tasks, besides  
451 morphological differences in performing the tasks (Krasheninnikova et al. 2019).

452 In addition, the PCTB was designed to examine the spontaneous ability to solve the  
453 tasks, and not to examine how long individuals need to learn the task. Hence, a test battery that  
454 continued testing until individuals reached a certain criterion (e.g. 80 % correct responses) or  
455 detailed analyses of applied learning strategies as in Devaine et al. (2017) may allow to compare  
456 not only species differences in their spontaneous ability to solve the task, but also species-  
457 specific learning curves as well as learning strategies, which might reveal more informative  
458 differences.

459 To conclude, our study generated the first systematic results on cognitive abilities in  
460 lemurs, and the comparison with haplorhines suggests that in many aspects of the physical and  
461 social domain, the average performance in these tests of members of these two lineages do not

462 differ substantially from each other. These results reject the notion of a direct correlation  
463 between brain size and cognitive abilities and question assumptions of domain-general  
464 cognitive skills in primates. Overall, our results strengthen the view that when comparing  
465 cognitive abilities among species, it is of vital importance to include a diverse set of tests from  
466 both cognitive domains which are applicable to a diverse range of species and taxa (Auersperg  
467 et al. 2011, 2013; Burkart et al. 2016; MacLean et al. 2012; Schmitt et al. 2012) and to carefully  
468 consider the external validity of the specific tests (Krasheninnikova et al. 2019).

469

## 470 REFERENCES

- 471 Agrillo C, Piffer L, Bisazza A, Butterworth B (2012) Evidence for two numerical systems that  
472 are similar in humans and guppies. *PLoS ONE* 7(2):e31923.
- 473 Aiello LC, Wheeler P (1995) The expensive-tissue hypothesis: the brain and the digestive  
474 system in human and primate evolution. *Curr Anthropol* 36:199–221.
- 475 Amici F, Aureli F, Call J (2008) Fission-Fusion dynamics, behavioral flexibility, and inhibitory  
476 control in primates. *Curr Biol* 18:1415–1419.
- 477 Amici F, Aureli F, Call J (2010) Monkeys and apes: are their cognitive skills really so different?  
478 *J Phys Anthropol* 143:188–197. doi:10.1002/ajpa.21305
- 479 Amici F, Barney B, Johnson VE, Call J, Aureli FA (2012) Modular mind? A test using  
480 individual data from seven primate species. *PLoS ONE* 7(12):e51918.
- 481 Anderson JR, Mitchell RW (1999) Macaques but not lemurs co-orient visually with humans.  
482 *Folia Primatol* 70:17–22.
- 483 Auersperg AMI, Gajdon GK, von Bayern AMP (2013) A new approach to comparing problem  
484 solving, flexibility and innovation. *Comm Integ Biol* 5:1–6.
- 485 Auersperg AMI, von Bayern AMP, Gajdon GK, Huber L, Kacelnik A (2011) Flexibility in  
486 problem solving and tool use of Kea and New Caledonian crows in a multi access box  
487 paradigm. *PLoS ONE* 6(6):e20231. doi:10.1371/journal.pone.0020231
- 488 Baden AL, Webster TH, Kamilar JM (2015) Resource seasonality and reproduction predict  
489 fission-fusion dynamics in black-and-white ruffed lemurs (*Varecia variegata*). *Am J*  
490 *Primatol* 78(2):256–279. doi:10.1002/ajp.22507
- 491 Benson-Amram S, Dantzer B, Stricker G, Swanson EM, Holekamp KE (2016) Brain size  
492 predicts problem-solving ability in mammalian carnivores. *PNAS* 113(9):2532–2537.

- 493 Botting JL, Wiper ML, Anderson JR (2011) Brown (*Eulemur fulvus*) and ring-tailed lemurs  
494 (*Lemur catta*) use human head orientation as a cue to gaze direction in a food choice  
495 task. *Folia Primatol* 82(3):165–176.
- 496 Boyd R, Richerson PJ (1988) Why culture is common, but cultural evolution is rare. *Proc Br*  
497 *Acad* 88:77–93.
- 498 Brotcorne F, et al (2017) Intergroup variation in robbing and bartering by long-tailed macaques  
499 at Uluwatu Temple (Bali, Indonesia). *Primates* 58(4):505–516.
- 500 Burkart JM, Schubiger MN, van Schaik CP (2016) The evolution of general intelligence. *Behav*  
501 *2016*; 1–65.
- 502 Byrne RW (1996) Relating brain size to intelligence. In: Mellars P, Gibson K (eds) *Modelling*  
503 *the Early Human Mind*. McDonald Institute Research Monographs, Cambridge, pp. 49–  
504 56.
- 505 Byrne RW, Bates LA (2010) Primate social cognition: Uniquely primate, uniquely social, or  
506 just unique? *Neuron* 65:815–830.
- 507 Byrne RW, Whiten A (1988) *Machiavellian Intelligence: Social expertise and the evolution of*  
508 *intellect in monkeys, apes and humans*. Clarendon Press, Oxford.
- 509 Chittka L, Geiger K (1995) Can honey bees count landmarks? *Anim Behav* 49:159–164.
- 510 Clutton-Brock TH, Harvey PH (1980) Primates, brains and ecology. *J Zool* 190:309–323.  
511 doi:10.1111/j.1469-7998.1980.tb01430.x
- 512 Deaner RO, van Schaik C, Johnson V (2006) Do some taxa have better domain-general  
513 cognition than others? A metaanalysis of nonhuman primate studies. *Evol Psych* 4:149–  
514 196.
- 515 Deaner RO, Isler K, Burkart J, van Schaik C (2007) Overall brain size, and not encephalization  
516 quotient, best predicts cognitive ability across non-human primates. *Brain, Behav Evol*  
517 *70*:115–124.
- 518 DeCasien AR, Williams SA, Higham JP (2017) Primate brain size is predicted by diet but not  
519 sociality. *Nature Ecology & Evolution*, 1, 1–7. <http://doi.org/10.1038/s41559-017-0112>
- 520 Deppe AM, Wright PC, Szelistowski WA (2009) Object permanence in lemurs. *Anim Cogn*  
521 *12*:381–388.
- 522 Devaine M, San-Galli A, Trapanese C, Bardino G, Hano C, Saint Jalme M, Sebastien Bouret  
523 S, Masi S, Daunizeau J (2017) Reading wild minds: A computational assay of Theory  
524 of Mind sophistication across seven primate species. *PLoS Comp Biol*  
525 *13*(11):e1005833.

- 526 Dunbar RIM (1992) Neocortex size as a constraint on group size in primates. *Journal of Human*  
527 *Evol* 20:469–493.
- 528 Dunbar RIM, Bever J (1998) Neocortex size predicts group size in carnivores and some  
529 insectivores. *Ethol* 104(8):695–708.
- 530 Dunbar RIM, Shultz S (2007) Understanding primate brain evolution. *Phil Trans R Soc B*  
531 362:649–658. doi:10.1098/rstb.2006.2001
- 532 Dunbar RIM, Shultz S (2017) Why are there so many explanations for primate brain evolution?  
533 *Phil Trans R Soc B* 372:20160244. doi:10.1098/rstb.2016.0244
- 534 Eberle M, Kappeler P (2006) Family insurance: kin selection and cooperative breeding in a  
535 solitary primate (*Microcebus murinus*). *Behav Ecol Sociobiol* 60(4):582–588.
- 536 Ehrlich E, Fobes JL, King JE. Prosimian learning capacities. *J Hum Evol.* 1976; 5:599–617.
- 537 Emery N, Seed A, von Bayern AMP, Clayton N (2007) Cognitive adaptations of social bonding  
538 in birds. *Phil Trans R Soc B* 362:489–505.
- 539 Fichtel C, Kappeler PM (2010) Human universals and primate symplesiomorphies: establishing  
540 the lemur baseline. In: Kappeler PM, Silk J (eds) *Mind the Gap: tracing the origins of*  
541 *human universals*. Berlin, Springer, pp. 395–426.
- 542 Finarelli JA, Flynn JJ (2009) Brain-size evolution and sociality in Carnivora. *PNAS*  
543 106(23):9345–9349.
- 544 Fuss T, Bleckmann H, Schluessel V (2014) Visual discrimination abilities in the gray bamboo  
545 shark (*Chiloscyllium griseum*). *Zool* 117(2):104–111.
- 546 Gould L, Sussman RW, Sauther ML (2003) Demographic and life-history patterns in a  
547 population of ring-tailed lemurs (*Lemur catta*) at Beza Mahafaly Reserve, Madagascar:  
548 a 15-year perspective. *Am J Phys Anthropol* 120:182–194. doi:10.1002/ajpa.10151
- 549 Gumert MD, Malaivijitnond S (2012). Marine prey processed with stone tools by Burmese long-  
550 tailed macaques (*Macaca fascicularis aurea*) in intertidal habitats. *Am J Phys Anthropol*  
551 149:447–457.
- 552 Heldstab SA et al (2016) Manipulation complexity in primates coevolved with brain size and  
553 terrestriality. *Sci Rep* 6:24528. doi:10.1038/srep24528
- 554 Herrmann E, Call J, Hernández-Lloreda MV, Hare B, Tomasello M (2007) Humans have  
555 evolved specialized skills of social cognition: the cultural intelligence hypothesis.  
556 *Science* 317:1360–1366.
- 557 Holekamp KE, Sakai ST, Lundrigan BL (2007) Social intelligence in the spotted hyena  
558 (*Crocuta crocuta*). *Phil Trans R Soc B* 362:523–538.

- 559 Holmes SM, Gordon AD, Louis EE, Johnson SE (2016) Fission-fusion dynamics in black-and-  
560 white ruffed lemurs may facilitate both feeding strategies and communal care of infants  
561 in a spatially and temporally variable environment. *Behav Ecol Sociobiol* 70:1949–  
562 1960. doi:10.1007/s00265-016-2201-4
- 563 Humphrey N (1976) The social function of intellect. In: Bateson PPG, Hinde RA (eds) *Growing*  
564 *points in ethology*. Cambridge University Press, pp. 303-317.
- 565 Isler K et al (2008) Endocranial volumes of primate species: scaling analyses using a  
566 comprehensive and reliable data set. *J Hum Evol* 55:967–978.
- 567 Itakura S (1996) An exploratory study of gaze-monitoring in nonhuman primates. *Jap Psychol*  
568 *Res* 38:174–180.
- 569 Jerison HJ (1973) *Evolution of the brain and intelligence*. New York: Academic Press.
- 570 Jolly A (1964) Prosimian's manipulation of simple object problems. *Anim Behav* 12:560–570.
- 571 Jolly A (1966a) Lemur social behaviour and primate intelligence. *Science* 153:501–506.
- 572 Jolly A (1966b) *Lemur Behavior*. Chicago University Press.
- 573 Joly M, Micheletta J, De Marco A, Langermans JA, Sterck EH, Waller BM (2017)  
574 Comparing physical and social cognitive skills in macaque species with different  
575 degrees of social tolerance. *Proc Roy Soc B*, 284(1862), 20162738.
- 576 Jones SM, Brannon EM (2012) Prosimian primates show ratio dependence in spontaneous  
577 quantity discriminations. *Front Psychol* 3:1–8.
- 578 Kaminski J, Riedel J, Call J, Tomasello M (2005) Domestic goats, *Capra hircus*, follow gaze  
579 direction and use social cues in an object choice task. *Anim Behav* 69:11–18.
- 580 Kappeler PM (1987) The acquisition process of a novel behaviour pattern in a group of ring-  
581 tailed lemurs (*Lemur catta*). *Primates* 28:225–228.
- 582 Kappeler PM, Heymann EW (1996) Nonconvergence in the evolution of primate life history  
583 and socio-ecology. *Biol J Linn Soc* 59:297–326.
- 584 Kendal R et al (2010) Evidence for social learning in wild lemurs (*Lemur catta*). *Learn and*  
585 *Behav* 38:220–234.
- 586 Kittler K, Schnoell AV, Fichtel C (2015) Cognition in ring-tailed lemurs. *Folia Primatol*  
587 86:106–116.
- 588 Kittler K, Kappeler PM, Fichtel C (2018) Instrumental problem solving in three lemur  
589 species. *J Comp Psychol* 302: 306-314
- 590 Kudo H, Dunbar RIM (2001) Neocortex size and social network size in primates. *Anim Behav*  
591 62:711–722.

- 592 Krasheninnikova A, Berardi R, Lind MA, O'Neill, L, von Bayern AM (2019) Primate  
593 cognition test battery in parrots. *Behaviour*, 156(5-8), 721-761
- 594 Loukola OJ, Perry CJ, Coscos L, Chittka L (2017) Bumblebees show cognitive flexibility by  
595 improving on an observed complex behavior. *Science* 355:833–836.
- 596 MacLean EL, Barrickman NL, Johnson EM, Wall CE (2009) Sociality, ecology and relative  
597 brain size in lemurs. *J Hum Evol* 56:471–478.
- 598 MacLean EL et al (2014) The evolution of self-control. *PNAS* 111:E2140–E2148.
- 599 MacLean EL et al (2012) How does cognition evolve? Phylogenetic comparative psychology.  
600 *Anim Cogn* 15:223–238.
- 601 MacLean EL, Merritt DJ, Brannon EM (2008) Social complexity predicts transitive reasoning  
602 in prosimian primates. *Anim Behav* 76:479–486.
- 603 MacLean EL et al (2013) Group size predicts social but not nonsocial cognition in lemurs. *PLoS*  
604 *ONE* 8:e66359.
- 605 Malassis R, Delfour F (2015) Sea lions' (*Zalophus californianus*) use of human pointing  
606 gestures as referential cues. *Learn Behav* 43(2):101–112.
- 607 Many Primates, Altschul DM, Beran MJ, Bohn M, Call J, DeTroy S, et al. (2019)  
608 Establishing an infrastructure for collaboration in primate cognition research. *PLoS*  
609 *ONE* 14(10): e0223675.
- 610 Martin RD (1981) Relative brain size and basal metabolic rate in terrestrial vertebrates.  
611 *Nature* 293:56–60.
- 612 Martin RD (1990) *Primate Origins and Evolution. A Phylogenetic Reconstruction*. London,  
613 Chapman & Hall.
- 614 Maslow AH, Harlow HF (1932) Comparative behaviour of primates. II. Delayed reaction tests  
615 on primates at Bronx Park Zoo. *J Comp Psychol* 14:97–107.
- 616 Merritt D, MacLean EL, Crawford JC, Brannon EM (2011) Numerical rule-learning in ring-  
617 tailed lemurs (*Lemur catta*). *Front Psychol* 2:41283.
- 618 Miklósi Á, Polgárdi R, Topál J, Csányi V (1998) Use of experimenter-given cues in dogs. *Anim*  
619 *Cogn* 1:113–121.
- 620 Milton K (1981) Distribution patterns of tropical plant foods as an evolutionary stimulus to  
621 primate mental development. *Am Anthropol* 83:534–548.
- 622 Navarrete A, van Schaik CP, Isler K (2011) Energetics and the evolution of human brain size.  
623 *Nature* 480:91–93.
- 624 Nawroth C, Ebersbach M, von Borell E. Are domestic pigs (*Sus scrofa domestica*) able to use  
625 complex human-given cues to find a hidden reward? (2016) *Anim Welf* 25(2):185–190

- 626 O'Mara MT, Hickey CM (2012) Social influences on the development of ringtailed lemur  
627 feeding ecology. *Anim Behav* 84:1547–1555.
- 628 Pahl M, Si A, Zhang S (2013) Numerical cognition in bees and other insects. *Front Psychol*  
629 4(162):1–9.
- 630 Pereira ME, Kappeler PM (1997) Divergent systems of agonistic behaviour in lemurid primates.  
631 *Behav* 134:225–274.
- 632 Pérez-Barbería FJ, Shultz S, Dunbar RIM (2007) Evidence for coevolution of sociality and  
633 relative brain size in three orders of mammals. *Evol* 61:2811–2821.
- 634 Picq J-L (1993) Radial maze performance in young and aged grey mouse lemurs (*Microcebus*  
635 *murinus*). *Primates* 34(2):223–226.
- 636 Powell LE, Isler K, Barton RA (2017) Re-evaluating the link between brain size and  
637 behavioural ecology in primates. *Proc R Soc B* 284:20171765.  
638 doi:10.1098/rspb.2017.1765
- 639 Reader SM, Hager Y, Laland KN (2011) The evolution of primate general and cultural  
640 intelligence. *Phil Trans R Soc B* 366:1017–1027. doi:10.1098/rstb.2010.0342
- 641 Reader SM, Laland KN (2002) Social intelligence, innovation, and enhanced brain size in  
642 primates. *PNAS* 99:4436–4441.
- 643 Rosati AG, Rodriguez K, Hare B (2014) The ecology of spatial memory in four lemur species.  
644 *Anim Cogn* 17:947–961.
- 645 Rosati AG (2017) Foraging cognition: Reviving the ecological intelligence hypothesis. *Trends*  
646 *Cogn Sci* 21(9):691–702. doi:10.1016/j.tics.2017.05.011
- 647 Sandel AA, MacLean EL, Hare B (2011) Evidence from four lemur species that ringtailed lemur  
648 social cognition converges with that of haplorhine primates. *Anim Behav* 81:925–931.
- 649 Santos LR, Barnes JL, Mahajan N (2005a) Expectations about numerical events in four lemur  
650 species (*Eulemur fulvus*, *Eulemur mongoz*, *Lemur catta* and *Varecia rubra*). *Anim Cogn*  
651 8:253–262.
- 652 Santos LR, Mahajan N, Barnes JL (2005b) How prosimian primates represent tools:  
653 experiments with two lemur species (*Eulemur fulvus* and *Lemur catta*). *J Comp Psych*  
654 119:394–403.
- 655 Schluessel V, Herzog H, Scherpenstein M (2015) Seeing the forest before the trees - spatial  
656 orientation in freshwater stingrays (*Potamotrygon motoro*) in a hole-board task. *Behav*  
657 *Proc* 119:105–115.
- 658 Schmitt V, Pankau B, Fischer J (2012) Old world monkeys compare to apes in the Primate  
659 Cognition Test Battery. *PLoS ONE* 7(4):e32024.



- 660 Schnoell AV, Fichtel C (2012) Wild redfronted lemurs (*Eulemur rufifrons*) use social  
661 information to learn new foraging techniques. *Anim Cogn* 15:505–516.
- 662 Schubiger MN, Kissling A, Burkart JM (2016) How task format affects cognitive  
663 performance: A memory test with two species of New World monkeys. *Anim Behav*  
664 121, 33-39.
- 665 Shepherd SV, Platt ML (2008) Spontaneous social orienting and gaze following in ringtailed  
666 lemurs (*Lemur catta*). *Anim Cogn* 11:13–20. doi:10.1007/s10071-007-0083-6
- 667 Shettleworth SJ (2010) *Cognition, Evolution and Behavior*. New York: Oxford University  
668 Press.
- 669 Shultz S, Dunbar RIM (2006) Both social and ecological factors predict ungulate brain size.  
670 *Proc R Soc B* 273:207–215.
- 671 Shultz S, Dunbar RIM (2007) The evolution of the social brain: anthropoid primates contrast  
672 with other vertebrates. *Proc R Soc B* 274:2429–2436.
- 673 Spearman C (1904) "General intelligence", objectively determined and measured. *American J*  
674 *Psychol* 15(2):201–292.
- 675 Stoinski TS, Drayton LA, Price EE (2011) Evidence of social learning in black-and-white  
676 ruffed lemurs (*Varecia variegata*). *Biol Lett*, 7(3), 376-379.
- 677 Sussmann RW (1991) Demography and social organization of free-ranging *Lemur catta* in the  
678 Beza Mahafaly Reserve, Madagascar. *Am Journal Phys Anthropol* 84:43–58.
- 679 Tomasello M, Call J (1997) *Primate Cognition*. Oxford University Press, New York.
- 680 Torigoe T (1985) Comparison of object manipulation among 74 species of non-human  
681 primates. *Primates* 26:182–194.
- 682 Tschudin A, Call J, Dunbar RIM, Harris G, van der Elst C (2001) Comprehension of signs by  
683 dolphins (*Tursiops truncatus*). *J Comp Psychol* 115:100–105.
- 684 Vasey N (2003) *Varecia*, ruffed lemurs. In: Goodman SM, Benstead JP (eds) *The natural*  
685 *history of Madagascar* Chicago. University Press, pp. 1332–1336.
- 686 van Horik J, Emery NJ (2011) Evolution of cognition. *Wiley Interdisciplinary Reviews:*  
687 *Cognitive Science*, 2(6), 621-633.
- 688 van Schaik CP, Fox EA, Fechtman LT (2003) Individual variation in the rate of use of tree-hole  
689 tools among wild orang-utans: implications for hominin evolution. *J Hum Evol*  
690 44(1):11–23.
- 691 Wallis LJ, Range F, Müller CA, Serisier S, Huber L, Virányi Z (2015) Training for eye contact  
692 modulates gaze following in dogs. *Anim Behav* 106:27–35.

693 Whiten A, van Schaik CP (2007) The evolution of animal 'cultures' and social intelligence. *Phil*  
694 *Trans R Soc B* 362(1480):603–620.

695 Yoder AD, Cartmill M, Ruvolo M, Smith K, Vilgalys R (1996) Ancient single origin for  
696 Malagasy primates. *Proc Nat Acad Sci* 93:5122–5126.

697 Yoder AD, Yang Z (2004) Divergence dates for Malagasy lemurs estimated from multiple  
698 gene loci: geological and evolutionary context. *Mol Ecol* 13:757–773.

699

700

701

## 702 **ACKNOWLEDGEMENTS**

703 We are grateful towards Silvio Dietzel and the “Erlebnispark Affenwald” for permission to  
704 work with their lemurs. We would also like to thank Esther Herrmann and Vanessa Schmitt for  
705 sharing the PCTB performance data of the great apes and monkeys with us. Furthermore, we  
706 are grateful to Ulrike Walbaum, Anna Zango Palau, Luise Zieba and Lluís Socias Martínez for  
707 helping with the experiments and inter-observer coding the videos. Thanks to Sarah Hartung,  
708 Henry Benseler and Ramona Lenzner-Pollmann for taking care of the animals. This study was  
709 supported by the DFG (awarded to CF: FI 929/8-1).

710

## 711 **AUTHORS' CONTRIBUTIONS**

712 C.F. and K.D. have a shared first-authorship, they conceived the study and analysed the data.

713 K.D. conducted the experiments. C.F., K.D. and P.M.K. wrote the manuscript. All authors gave  
714 final approval for publication.

715

## 716 **COMPETING INTERESTS**

717 We have no competing interests.

718 **FIGURES**

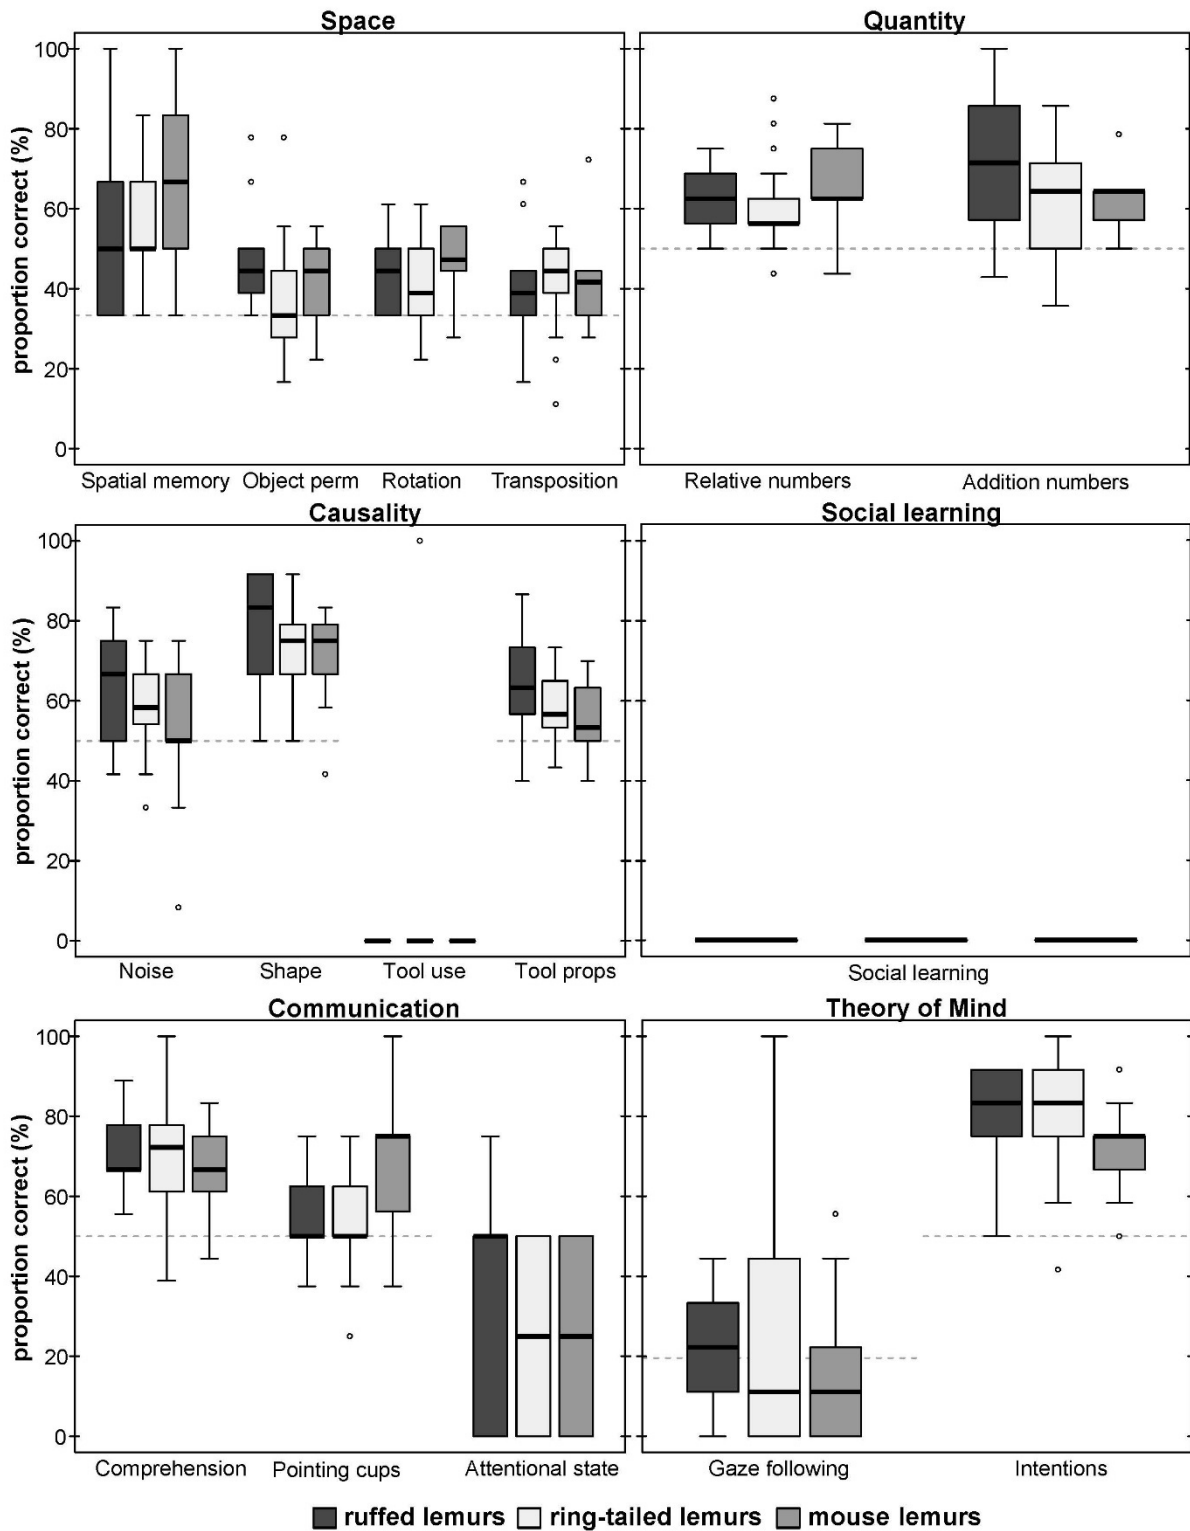

719

720 **Figure 1** Average performance of the three lemur species in all tasks of the PCTB. Represented are medians (black

721 bars), interquartile ranges (boxes), upper and lower hinges (whiskers), and outliers (circles).

722

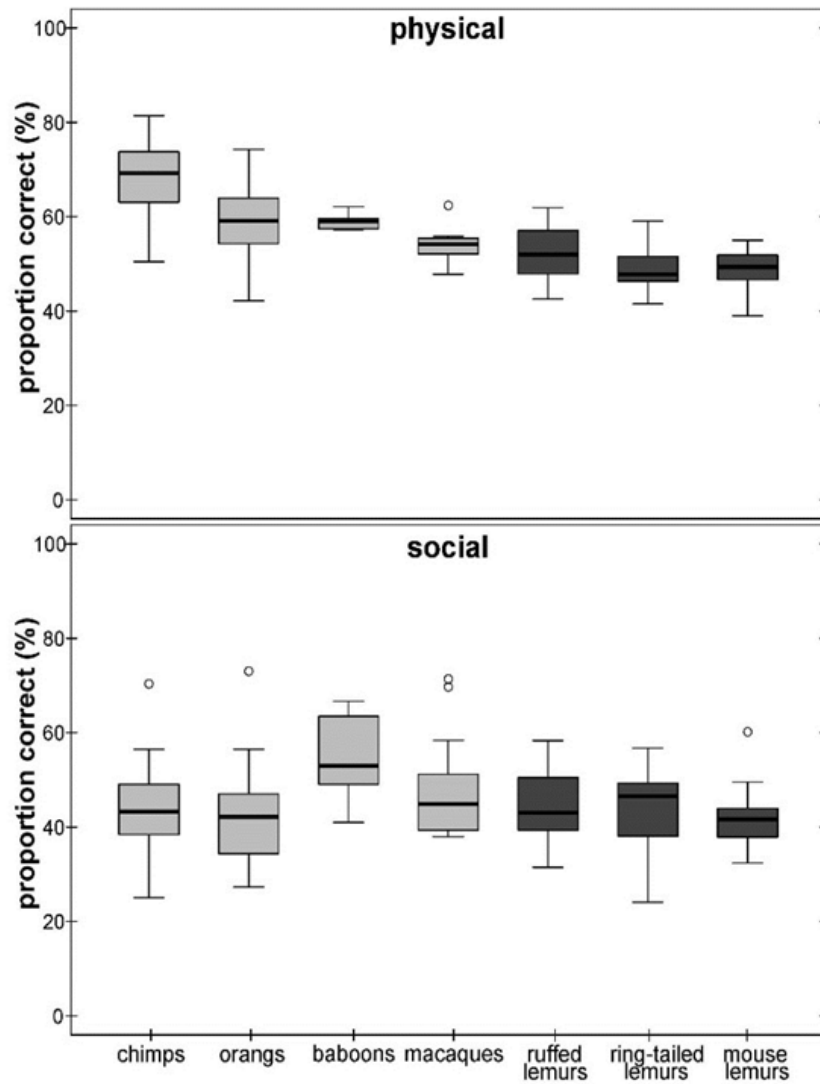

723

724 **Figure 2** Average performance of apes & monkeys (light grey) and lemurs (dark grey) in the two cognitive  
725 domains. Represented are medians (black bars), interquartile ranges (boxes), upper and lower hinges (whiskers),  
726 and outliers (circles).

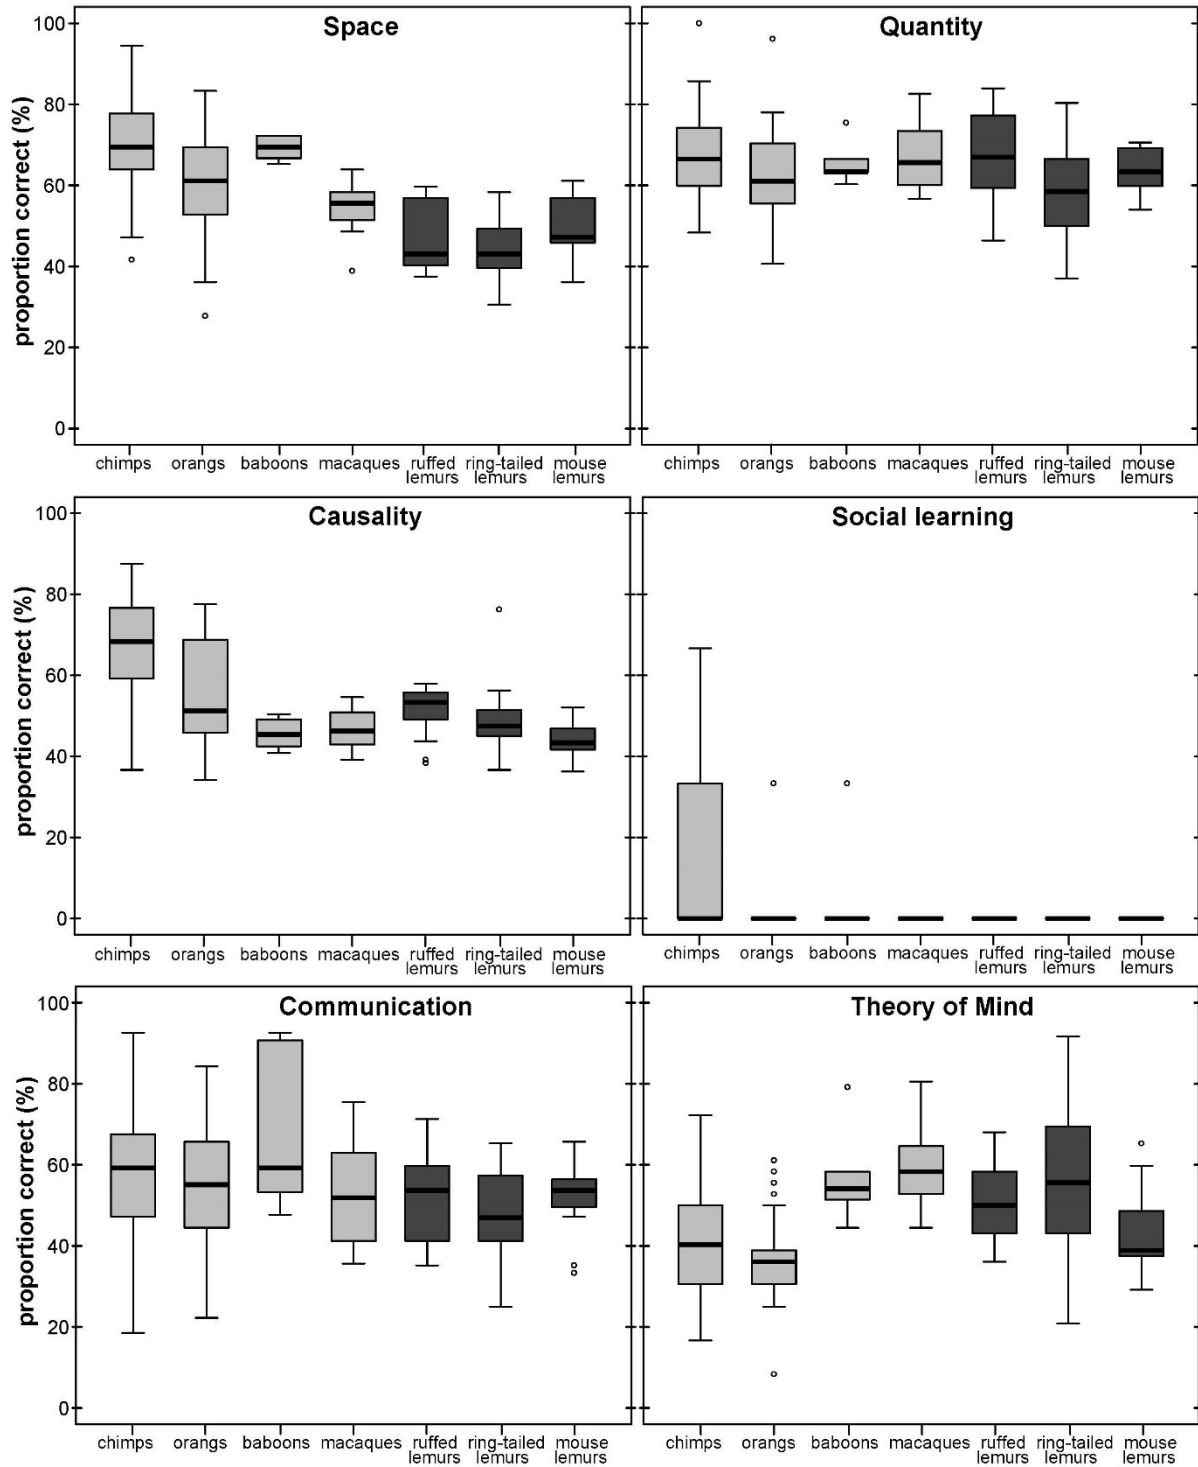

727

728 **Figure 3** Average performance of apes & monkeys (light grey) and lemurs (dark grey) over the six scales.

729 Represented are medians (black bars), interquartile ranges (boxes), upper and lower hinges (whiskers), and outliers

730 (circles).

731 **TABLES**

732  
733

**Table 1** Summary of the most important traits for the seven non-human primate species.

| <b>species</b>                                                    | <b>n</b> | <b>ECV<br/>(cc)</b> | <b>%<br/>fruit</b> | <b>dietary<br/>breadth</b> | <b>social<br/>system</b> | <b>average<br/>group size</b> |
|-------------------------------------------------------------------|----------|---------------------|--------------------|----------------------------|--------------------------|-------------------------------|
| <b>chimpanzees</b><br>( <i>Pan troglodytes</i> )                  | 106      | 368.4               | 66                 | 6                          | group                    | 47.6                          |
| <b>orangutans</b><br>( <i>Pongo pygmaeus</i> )                    | 32       | 377.4               | 64                 | 6                          | solitary                 | 1.5                           |
| <b>olive baboons</b><br>( <i>Papio anubis</i> )                   | 5        | 167.4               | 62                 | 6                          | group                    | 69                            |
| <b>long-tailed<br/>macaques</b><br>( <i>Macaca fascicularis</i> ) | 10-13    | 64                  | 66.9               | 5                          | group                    | 26                            |
| <b>ruffed lemurs</b><br>( <i>Varecia variegata</i> )              | 13       | 32.1                | 92                 | 4                          | group                    | 6                             |
| <b>ring-tailed lemurs</b><br>( <i>Lemur catta</i> )               | 26-27    | 22.9                | 54                 | 5                          | group                    | 11                            |
| <b>grey mouse lemurs</b><br>( <i>Microcebus murinus</i> )         | 9-16     | 1.6                 | 31.3               | 4                          | solitary                 | 1                             |

734  
735  
736  
737

n=number of individuals, ECV=endocranial volume (absolute brain size), % fruit=percentage of fruit in the diet; Data from: Herrmann et al. 2007; Schmitt et al. 2012; Isler et al. 2008; MacLean et al. 2014; Dammhan and Kappeler 2006; Radespiel et al. 2006; Lahann 2007.

738 **Table 2** Summary of the mean proportions of correct responses of the three lemur species in all tasks and *scales* of the PCTB.

|                        |        |         | Ruffed lemurs |             |       |    |        | Ring-tailed lemurs |             |       |    |        |    |             |       |    |        |
|------------------------|--------|---------|---------------|-------------|-------|----|--------|--------------------|-------------|-------|----|--------|----|-------------|-------|----|--------|
|                        | trials | chance  | n             | M           | adj p | SD | 95% CI | n                  | M           | adj p | SD | 95% CI | n  | M           | adj p | SD | 95% CI |
| <b>Physical domain</b> |        |         |               |             |       |    |        |                    |             |       |    |        |    |             |       |    |        |
| <b>Space</b>           |        |         |               | 46.8        |       | 8  | 51.58  |                    | 44.2        |       | 7  | 42.47  |    | 50.8        |       | 7  | 47.55  |
| Spatial memory         | 6      | 33      | 13            | <b>53.9</b> | 0.017 | 23 | 42.66  | 27                 | <b>55.6</b> | 0.001 | 17 | 49.62  | 15 | <b>66.7</b> | 0.004 | 18 | 58.68  |
| Object permanence      | 18     | 33      | 13            | <b>47.9</b> | 0.006 | 12 | 41.55  | 27                 | 38.3        | 0.112 | 15 | 32.44  | 12 | 42.1        | 0.074 | 10 | 36.48  |
| Rotation               | 18     | 33      | 13            | <b>45.3</b> | 0.014 | 10 | 40.51  | 26                 | <b>41.0</b> | 0.002 | 9  | 37.45  | 12 | <b>47.7</b> | 0.008 | 9  | 43.53  |
| Transposition          | 18     | 33      | 13            | 40.2        | 0.052 | 13 | 33.47  | 27                 | <b>42.2</b> | 0.001 | 11 | 38.46  | 12 | <b>41.2</b> | 0.019 | 12 | 35.48  |
| <b>Quantity</b>        |        |         |               | 66.4        |       | 12 | 60.73  |                    | 58.5        |       | 11 | 54.63  |    | 63.9        |       | 6  | 60.68  |
| Relative numbers       | 16     | 50      | 13            | <b>62.0</b> | 0.006 | 7  | 58.66  | 27                 | <b>60.4</b> | 0.007 | 10 | 57.64  | 9  | <b>66.0</b> | 0.019 | 11 | 59.73  |
| Addition numbers       | 14     | 50      | 13            | <b>70.9</b> | 0.014 | 20 | 60.82  | 26                 | <b>60.2</b> | 0.003 | 13 | 55.65  | 9  | <b>61.9</b> | 0.019 | 8  | 57.67  |
| <b>Causality</b>       |        |         |               | 51.0        |       | 7  | 47.55  |                    | 48.6        |       | 7  | 46.51  |    | 44.0        |       | 4  | 42.46  |
| Noise                  | 12     | 50      | 13            | <b>63.5</b> | 0.015 | 13 | 56.71  | 27                 | <b>59.3</b> | 0.002 | 10 | 55.63  | 15 | 50.0        | 0.958 | 17 | 41.59  |
| Shape                  | 12     | 50      | 13            | <b>76.9</b> | 0.006 | 15 | 69.85  | 27                 | <b>72.8</b> | 0.001 | 10 | 69.77  | 15 | <b>70.6</b> | 0.004 | 12 | 65.77  |
| Tool use               | 1      | -       | 13            | 0.0         | -     | -  | -      | 27                 | 3.7         | -     | 19 | -4.11  | 15 | 0.0         | -     | -  | -      |
| Tool properties        | 30     | 50      | 13            | <b>63.6</b> | 0.013 | 12 | 57.70  | 27                 | <b>58.6</b> | 0.001 | 8  | 56.62  | 15 | <b>55.6</b> | 0.040 | 9  | 51.60  |
| <b>Social domain</b>   |        |         |               |             |       |    |        |                    |             |       |    |        |    |             |       |    |        |
| <b>Social learning</b> | 3      | -       | 13            | 0.0         | -     | -  | -      | 26                 | 0.0         | -     | -  | -      | 12 | 0.0         | -     | -  | -      |
| <b>Communication</b>   |        |         |               | 53.1        |       | 12 | 47.60  |                    | 49.6        |       | 11 | 46.54  |    | 52.1        |       | 9  | 47.57  |
| Comprehension          | 18     | 50      | 13            | <b>70.9</b> | 0.006 | 10 | 66.76  | 27                 | <b>70.8</b> | 0.001 | 13 | 66.76  | 13 | <b>65.4</b> | 0.008 | 11 | 59.72  |
| Pointing cups          | 8      | 50      | 13            | 53.9        | 0.220 | 9  | 49.59  | 27                 | 55.1        | 0.050 | 12 | 51.59  | 15 | <b>68.3</b> | 0.008 | 16 | 60.76  |
| Attentional state      | 4      | -       | 13            | 34.6        | -     | 28 | 19.50  | 26                 | 21.2        | -     | 22 | 13.30  | 14 | 25.0        | -     | 22 | 14.36  |
| <b>Theory of mind</b>  |        |         |               | 43.7        |       | 10 | 45.57  |                    | 56.8        |       | 18 | 50.64  |    | 51.4        |       | 11 | 39.49  |
| Gaze following         | 9      | 20 (bl) | 13            | 23.9        | 0.326 | 17 | 15.33  | 27                 | 30.0        | 0.340 | 33 | 18.42  | 15 | 11.1        | 0.713 | 17 | 2.20   |
| Intentions             | 12     | 50      | 13            | <b>78.9</b> | 0.006 | 13 | 72.86  | 27                 | <b>83.6</b> | 0.001 | 15 | 78.89  | 15 | <b>71.1</b> | 0.004 | 10 | 66.76  |

739 Numbers in boldface: Significant deviations from chance level (Wilcoxon tests); Trials=number of trials per task; chance=chance-level for each task; n=number of participating individuals;  
 740 M=means of performance; adj= adjusted p-values (Benjamini-Hochberg-corrections); SD=standard deviation; CI=confidence interval; bl= baseline calculated from control condition.

741  
742  
743

**Table 3** Univariate analyses for the species differences for the six scales.

| <b>ANOVAs</b> | <b>Df</b> | <b>F-value</b> | <b>P-value</b>   |
|---------------|-----------|----------------|------------------|
| Quantity      | 6         | 3.49           | <b>0.0026</b> ** |
| Communication | 6         | 2.10           | 0.0549           |

  

| <b>Kruskal-Wallis tests</b> | <b>Df</b> | <b><math>\chi^2</math></b> | <b>P-value</b>       |
|-----------------------------|-----------|----------------------------|----------------------|
| Space                       | 6         | 111.68                     | <b>&lt;0.001</b> *** |
| Causality                   | 6         | 68.59                      | <b>&lt;0.001</b> *** |
| Social learning             | 6         | 20.17                      | <b>0.0026</b> **     |
| Theory of Mind              | 6         | 55.08                      | <b>&lt;0.001</b> *** |

\*\*<0.01; \*\*\*<0.001 - significance levels

744  
745  
746



747 **Table 4** Comparisons of performance among the seven non-human primate species for all six scales of the PCTB.  
 748 Presented are the results of *post hoc* multiple comparisons (Bonferroni); significant results are in boldface.  
 749 Causality II: The scale causality without the tools use task.

|                                  | Space        | Quantity | Causality    | Causality II | Social learning | Communication | Theory of Mind |
|----------------------------------|--------------|----------|--------------|--------------|-----------------|---------------|----------------|
| Chimp - Orang                    | <0.001       | 0.275    | <0.001       | 1            | 1               | 1             | 1              |
| Chimp - Baboon                   | 1            | 1        | <b>0.003</b> | 1            | 1               | 1             | 0.082          |
| Chimp - Macaque                  | <0.001       | 1        | <0.001       | 1            | 0.699           | 1             | <0.001         |
| Chimp - Ruffed lemur             | <0.001       | 1        | <0.001       | 1            | 0.352           | 1             | 0.077          |
| Chimp - Ring-tailed lemur        | <0.001       | <0.001   | <0.001       | 1            | <b>0.025</b>    | 0.29          | <0.001         |
| Chimp - Mouse lemur              | <0.001       | 1        | <0.001       | <b>0.041</b> | 0.229           | 1             | 1              |
| Orang - Baboon                   | 1            | 1        | 1            | 1            | 1               | 0.677         | <b>0.014</b>   |
| Orang - Macaque                  | 1            | 1        | 0.433        | 1            | 1               | 1             | <0.001         |
| Orang - Ruffed lemur             | <b>0.004</b> | 1        | 1            | 0.560        | 1               | 1             | <b>0.009</b>   |
| Orang - Ring-tailed lemur        | <0.001       | 1        | 0.643        | 1            | 0.919           | 1             | <0.001         |
| Orang - Mouse lemur              | 0.237        | 1        | <b>0.046</b> | 0.918        | 1               | 1             | 1              |
| Baboon - Macaque                 | 0.176        | 1        | 1            | 1            | 1               | 0.591         | 1              |
| Baboon - Ruffed lemur            | <b>0.001</b> | 1        | 1            | 1            | 1               | 0.653         | 1              |
| Baboon - Ring-tailed lemur       | <0.001       | 1        | 1            | 1            | 1               | 0.094         | 1              |
| Baboon - Mouse lemur             | <b>0.023</b> | 1        | 1            | 1            | 1               | 0.424         | 0.816          |
| Macaque - Ruffed lemur           | 1            | 1        | 1            | 1            | 1               | 1             | 1              |
| Macaque - Ring-tailed lemur      | 0.074        | 0.307    | 1            | 1            | 1               | 1             | 1              |
| Macaque - Mouse lemur            | 1            | 1        | 1            | 1            | 1               | 1             | <b>0.033</b>   |
| Ruffed lemur - Ring-tailed lemur | 1            | 0.409    | 1            | 1            | 1               | 1             | 1              |
| Ruffed lemur - Mouse lemur       | 1            | 1        | 1            | <b>0.008</b> | 1               | 1             | 1              |
| Ring-tailed lemur - Mouse lemur  | 1            | 1        | 1            | 0.106        | 1               | 1             | <b>0.036</b>   |

750
